# Supplementary material for: Safety Planning Intervention for Adolescents: Provider Attitudes and Response to Training in the Emergency Services Setting
Source: Atypon-hosted journal article supplement (doi:10.1176/appi.ps.201900563), 2020-08-25
Supplement: appi.ps.201900563.ds001.pdf [file appi.ps.201900563.ds001.pdf]

## Safety Planning Intervention Pre-Training and Post-Training Questions

Instructions: Please rate how much you agree with the following statements. Circle the answer that is the best fit for you.

**1. I have a good understanding of safety planning for pediatric patients with current or a history of suicidality (thoughts and/or behaviors).**

1      2      3      4      5      6      7  
Strongly Disagree      Neutral      Strongly Agree

**2. I feel comfortable safety planning in the emergency service (Bradley Access, Hasbro ED, other EDs) setting.**

1      2      3      4      5      6      7  
Strongly Disagree      Neutral      Strongly Agree

**3. I am confident in my ability to safety plan with patients.**

1      2      3      4      5      6      7  
Strongly Disagree      Neutral      Strongly Agree

**4. I am confident in my ability to discuss restricting access to lethal means with patients and their families.**

1      2      3      4      5      6      7  
Strongly Disagree      Neutral      Strongly Agree

**5. I am confident in my ability to help patients develop a safety plan when they present to emergency services.**

1      ---      2      ---      3      ---      4      ---      5      ---      6      ---      7  
Strongly Disagree      Neutral      Strongly Agree

**6. I am confident in my ability to discuss reasons for living with patients.**

1      ---    2      ---    3      ---    4      ---    5      ---    6      ---    7  
Strongly Disagree                          Neutral                          Strongly Agree

**7. I want to learn effective methods for safety planning with pediatric patients with suicidality.**

1      ---      2      ---      3      ---      4      ---      5      ---      6      ---      7  
Strongly Disagree      Neutral      Strongly Agree

**8. I have a good understanding of suicide safety planning and intervention.**

1      ---    2      ---    3      ---    4      ---    5      ---    6      ---    7  
Strongly Disagree                          Neutral                          Strongly Agree



Strongly Agree

1      ---      2      ---      3      ---      4      ---      5      ---      6      ---      7  
Strongly Disagree                                  Neutral                                  Strongly Agree

1      ---      2      ---      3      ---      4      ---      5      ---      6      ---      7  
Strongly Disagree                                  Neutral                                  Strongly Agree

1      2      3      4      5      6      7  
Strongly Disagree      Neutral      Strongly Agree

1      2      3      4      5      6      7  
Strongly Disagree      Neutral      Strongly Agree

1      ---      2      ---      3      ---      4      ---      5      ---      6      ---      7  
Strongly Disagree                          Neutral                          Strongly Agree

1      ---    2      ---    3      ---    4      ---    5      ---    6      ---    7  
Strongly Disagree                          Neutral                          Strongly Agree

1      2      3      4      5      6      7  
Strongly Disagree      Neutral      Strongly Agree
